# Supplementary material
Source: PubMed Central journal article supplement (PMC5851779)
Supplement: NIHMS947481-supplement-Supplemental_fig.pdf [file NIHMS947481-supplement-Supplemental_fig.pdf]

**Developmental Cell, Volume 43**

**Supplemental Information**

**A Chemical-Genetic Approach Reveals  
the Distinct Roles of GSK3 $\alpha$  and GSK3 $\beta$   
in Regulating Embryonic Stem Cell Fate**

**Xi Chen, Ruizhe Wang, Xu Liu, Yongming Wu, Tao Zhou, Yujia Yang, Andrew Perez, Ying-Chu Chen, Liang Hu, Jean Paul Chadarevian, Amir Assadieskandar, Chao Zhang, and Qi-Long Ying**

Figure S1.

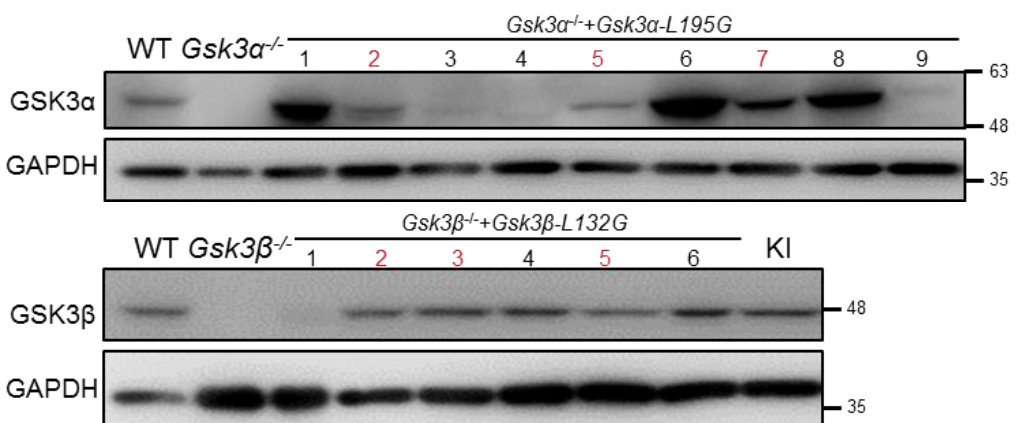

**Figure S1. Related to Figure 4. Transgene expression level of individual ES clones.** Western blot analysis of GSK3α/β protein expression in individual mutant clones. WT, wild-type ES cells. KI, *Gsk3β*-L132G knockin ES cells. Clones selected for phenotypic tests were highlighted in red.
